# Supplementary material
Source: PubMed Central journal article supplement (PMC3945305)
Supplement: supp_M113.536805_jbc.M113.536805-1.pdf [file supp_M113.536805_jbc.M113.536805-1.pdf]

**Table 1: Oligonucleotide primers employed.**

| Gene                   |                                      | Primer Sequence                | Tm (°C) | Amplicon Size (bp) |
|------------------------|--------------------------------------|--------------------------------|---------|--------------------|
| 9s rRNA                | F                                    | 5'-ATCCGCCAACGTCACATT-3'       | 57.6    | 115                |
|                        | R                                    | 5'-CCGCCGCCATAAGGAGAAC-3'      | 64.5    |                    |
| $\beta$ -Actin         | F                                    | 5'-CCAGAGGCGTACAGGGATAG-3'     | 64.5    | 137                |
|                        | R                                    | 5'-CCAACCGCGAGAAGATGA-3'       | 59.9    |                    |
| TNF- $\alpha$          | F                                    | 5'-CCTCTCTCTAATCAGCCCTCTG-3'   | 60.8    | 220                |
|                        | R                                    | 5'-GAGGACCTGGGAGTAGATGAG-3'    | 60.2    |                    |
| IL-6                   | F                                    | 5'-AATTCGGTACATCCTCGACGG-3'    | 61.7    | 113                |
|                        | R                                    | 5'-TTGGAAGGTTTCAGGTTGTTTTCT-3' | 60.2    |                    |
| IL-8                   | F                                    | 5'-TTTTGCCAAGGAGTGCTAAAGA-3'   | 60.1    | 194                |
|                        | R                                    | 5'-AACCTCTGCACCCAGTTTTTC-3'    | 62.5    |                    |
| TNF- $\alpha$ Promoter | F                                    | 5'-CCCTCCAGTTCTAGTTCTATC-3'    | 52.4    | 371                |
|                        | R                                    | 5'-GGGGAAAGAATCATTCAACCAG-3'   | 53      |                    |
| IL-6 Promoter          | F                                    | 5'-TTGCGATGCTAAAGGACG-3'       | 48      | 257                |
|                        | R                                    | 5'-TGTGGAGAAGGAGTTCATAGC-3'    | 52      |                    |
| IL-8 Promoter          | F                                    | 5'-GTTGTAGTATGCCCTAAGAG-3'     | 52      | 407                |
|                        | R                                    | 5'-CTCAGGGCAAACCTGAGTCATC-3'   | 57      |                    |
| $\alpha$ -satellite    | Cat #4486, Cell Signaling Technology |                                |         |                    |

**Table 2: Small interfering RNAs (siRNAs) employed.**

| Target sequence | ON-TARGETplus Human PPAR $\gamma$ siRNA - SMARTpool (L-003436-00-0005) | ON-TARGETplus Non-targeting Pool (D-001810-10) |
|-----------------|------------------------------------------------------------------------|------------------------------------------------|
| 1               | 5'-CAAUUCACCAUUCGUUAUC-3'                                              | Not provided by Dharmacon                      |
| 2               | 5'-GACAUGAAUCCUUAUGA-3'                                                |                                                |
| 3               | 5'-GAUAUCAAGCCCUUCACUA-3'                                              |                                                |
| 4               | 5'-GACAGCGACUUGGCAAUAU-3'                                              |                                                |
